# Supplementary material for: Effect of calcium nitrate on physico-chemical changes and shelf-life of aonla (Emblica officinalis Gaertn) fruits.
Source: Royal Society of Chemistry journal article supplement (doi:10.1039/c002504f), 2012-01-01
Supplement: c002504f.pdf [file c002504f.pdf]

## The first asymmetric organolithium tetramers with simple ether donor bases

Tanja Tatic<sup>a</sup>, Kathrin Meindl<sup>a</sup>, Julian Henn<sup>a</sup>, Sushil Kumar Pandey<sup>b</sup>, and Dietmar Stalke<sup>\*a</sup>

## Experimental Section:

## General procedure:

The oxygen donor bases Et<sub>2</sub>O (for **1**), *t*BuOMe (for **2**), and DME (for **3**) (1.5 equivalent.) were added to trimethylsilylmethyl lithium in hexane at 0 °C under a protective atmosphere. Crystallization was carried out in a freezer (−45 °C).

[(Et<sub>2</sub>O)<sub>2</sub>·(LiCH<sub>2</sub>SiMe<sub>3</sub>)<sub>4</sub>] (**1**):

Yield: 0.98 g (1.87 mmol, 58 %) Found: C, 52.74; H, 12.41. Li<sub>4</sub>C<sub>24</sub>H<sub>64</sub>O<sub>2</sub>Si<sub>4</sub> requires C, 54.92; H, 12.29 %;  $\delta^1_{\text{H}}$  (500 MHz, Tol-D<sub>8</sub>) −1.96 (s, 8 H, CH<sub>2</sub>Li), 0.24 (s, 36 H, Si(CH<sub>3</sub>)<sub>3</sub>), 1.09 (t, 12 H, *J* 7.01 Hz, CH<sub>2</sub>CH<sub>3</sub>), 3.28 (q, 8 H, *J* 7.01 Hz, OCH<sub>2</sub>);  $\delta^{13}_{\text{C}}$  (75 MHz, Tol-D<sub>8</sub>) −5.31 (CH<sub>2</sub>Li), 4.25 (Si(CH<sub>3</sub>)<sub>3</sub>), 15.27 (CH<sub>2</sub>CH<sub>3</sub>), 65.66 (OCH<sub>2</sub>);  $\delta^{29}_{\text{Si}}$  (99 MHz, Tol-D<sub>8</sub>) −1.13 (s);  $\delta^7_{\text{Li}}$  (194 MHz, Tol-D<sub>8</sub>) −1.99 (s), 1.24 (s), 0.95 (s), 0.70 (s).

[(*t*BuOMe)<sub>2</sub>·(LiCH<sub>2</sub>SiMe<sub>3</sub>)<sub>4</sub>] (**2**):

Yield: 1.12 g (2.02 mmol, 63 %) Found: C, 56.51; H, 12.62. Li<sub>4</sub>C<sub>26</sub>H<sub>68</sub>O<sub>2</sub>Si<sub>4</sub> requires C, 56.48; H, 12.40 %;  $\delta^1_{\text{H}}$  (500 MHz, Tol-D<sub>8</sub>) −1.72 (s, 8 H, CH<sub>2</sub>Li), 0.38 (s, 36 H, Si(CH<sub>3</sub>)<sub>3</sub>), 0.96 (s, 18 H, C(CH<sub>3</sub>)<sub>3</sub>), 2.92 (s, 6 H, OCH<sub>3</sub>);  $\delta^{13}_{\text{C}}$  (126 MHz, Tol-D<sub>8</sub>) −3.88 (CH<sub>2</sub>Li), 5.55 (Si(CH<sub>3</sub>)<sub>3</sub>), 27.47 (C(CH<sub>3</sub>)<sub>3</sub>), 50.27 (CH<sub>3</sub>O), 75.07 (C(CH<sub>3</sub>)<sub>3</sub>);  $\delta^7_{\text{Li}}$  (194 MHz, Tol-D<sub>8</sub>) 2.75 (s). All the spectra had to be measured at −50 °C because of the low stability of the compound in solution.

At room temperature:  $\delta^7_{\text{Li}}$  (194 MHz, Tol-D<sub>8</sub>) 2.41 (s), 1.61 (s), 1.33 (s), 1.07 (s)

[(DME)·(LiCH<sub>2</sub>SiMe<sub>3</sub>)<sub>2</sub>] (**3**):

Yield: 0.64 g (1.94 mmol, 61 %) Found: C, 50.37; H, 10.98. Li<sub>4</sub>C<sub>16</sub>H<sub>42</sub>O<sub>4</sub>Si<sub>2</sub> requires C, 52.14; H, 11.49 %;  $\delta^1_{\text{H}}$  (300 MHz, C<sub>6</sub>D<sub>6</sub>) −1.95 (s, 4 H, CH<sub>2</sub>Li), 0.39 (s, 18 H, Si(CH<sub>3</sub>)<sub>3</sub>), 2.95 (s, 8 H, CH<sub>2</sub>O), 3.09 (s, 12 H, OCH<sub>3</sub>);  $\delta^{13}_{\text{C}}$  (75 MHz, C<sub>6</sub>D<sub>6</sub>) −6.55 (CH<sub>2</sub>Li), 5.76 (Si(CH<sub>3</sub>)<sub>3</sub>), 58.80 (OCH<sub>3</sub>), 70.18 (CH<sub>2</sub>O);  $\delta^{29}_{\text{Si}}$  (60 MHz, C<sub>6</sub>D<sub>6</sub>) −0.68 (s);  $\delta^7_{\text{Li}}$  (117 MHz, C<sub>6</sub>D<sub>6</sub>) −1.92 (s).

**Fig. 1** <sup>1</sup>H-DOSY-NMR-spectra of [(DME)·(LiCH<sub>2</sub>SiMe<sub>3</sub>)<sub>2</sub>] (**3**)

LiCH<sub>2</sub>SiMe<sub>3</sub>  $D = -9.024 \log(\text{m}^2\text{s}^{-1})$

1,2-dimethoxyethane  $D = -8.868 \log(\text{m}^2\text{s}^{-1})$

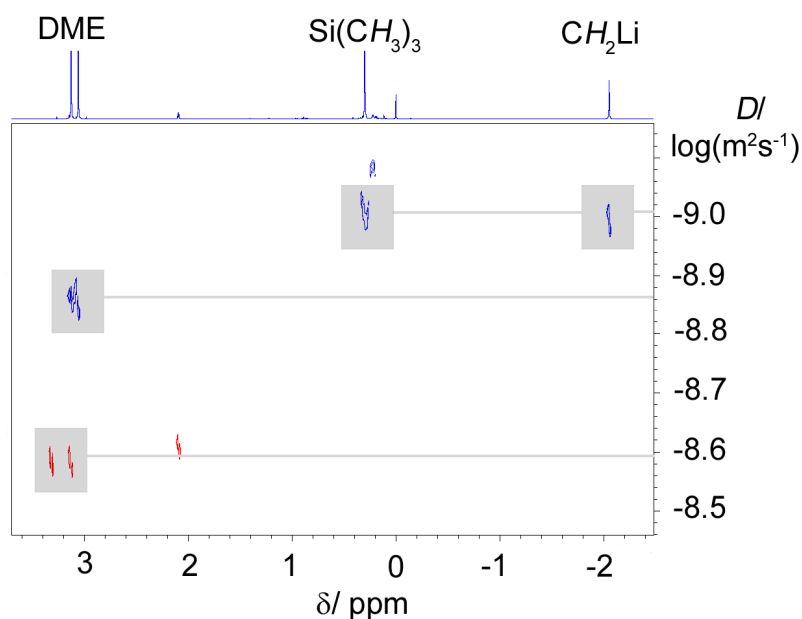

## The first asymmetric organolithium tetramers with simple ether donor bases

Tanja Tatic<sup>a</sup>, Kathrin Meindl<sup>a</sup>, Julian Henn<sup>a</sup>, Sushil Kumar Pandey<sup>b</sup>, and Dietmar Stalke<sup>\*a</sup>

## Single-crystal structural analysis:

The single crystals were mounted in inert oil under protective atmosphere by applying special cryo application techniques.<sup>1</sup> The X-ray data sets were collected at 100(2) K on an INCOATEC Microsource device<sup>2</sup> (**1**, **2**) or on a sealed tube (**3**) with mirror-monochromated Mo-K $\alpha$  radiation ( $\lambda = 0.71073$  Å). Both instruments were equipped with a Bruker Smart Apex II detector. Structures were solved by direct methods with SHELXS and refined by full-matrix least squares on  $F^2$  for all data with SHELXL.<sup>3</sup> Non-hydrogen atoms were refined with anisotropic displacement parameters. H atoms in non-disordered C $\alpha$ -positions were located in the difference Fourier map and refined isotropically, all other H atoms were placed in calculated positions and refined using a "riding-model".

[(Et<sub>2</sub>O)<sub>2</sub>·(LiCH<sub>2</sub>SiMe<sub>3</sub>)<sub>4</sub>] (**1**):

Li<sub>4</sub>C<sub>24</sub>H<sub>64</sub>O<sub>2</sub>Si<sub>4</sub>,  $M = 524.87$ , monoclinic, space group  $P2_1$ ,  $a = 10.882(7)$ ,  $b = 19.081(13)$ ,  $c = 18.544(12)$  Å,  $V = 3719(4)$  Å<sup>3</sup>,  $Z = 4$ ,  $\mu(\text{Mo-K}\alpha) = 0.175$  mm<sup>-1</sup>,  $T = 100(2)$  K, 146011 reflections measured, 24606 unique reflections,  $R_{\text{int}} = 0.0386$ , 767 parameters refined,  $R_1$  (all data) = 0.0433,  $R_1$  [ $I > 2\sigma(I)$ ] = 0.0336,  $wR_2$  (all data) = 0.0832,  $wR_2$  [ $I > 2\sigma(I)$ ] = 0.0782, GOF = 1.045, largest diff. peak and hole 0.449 and -0.213 eÅ<sup>-3</sup>.

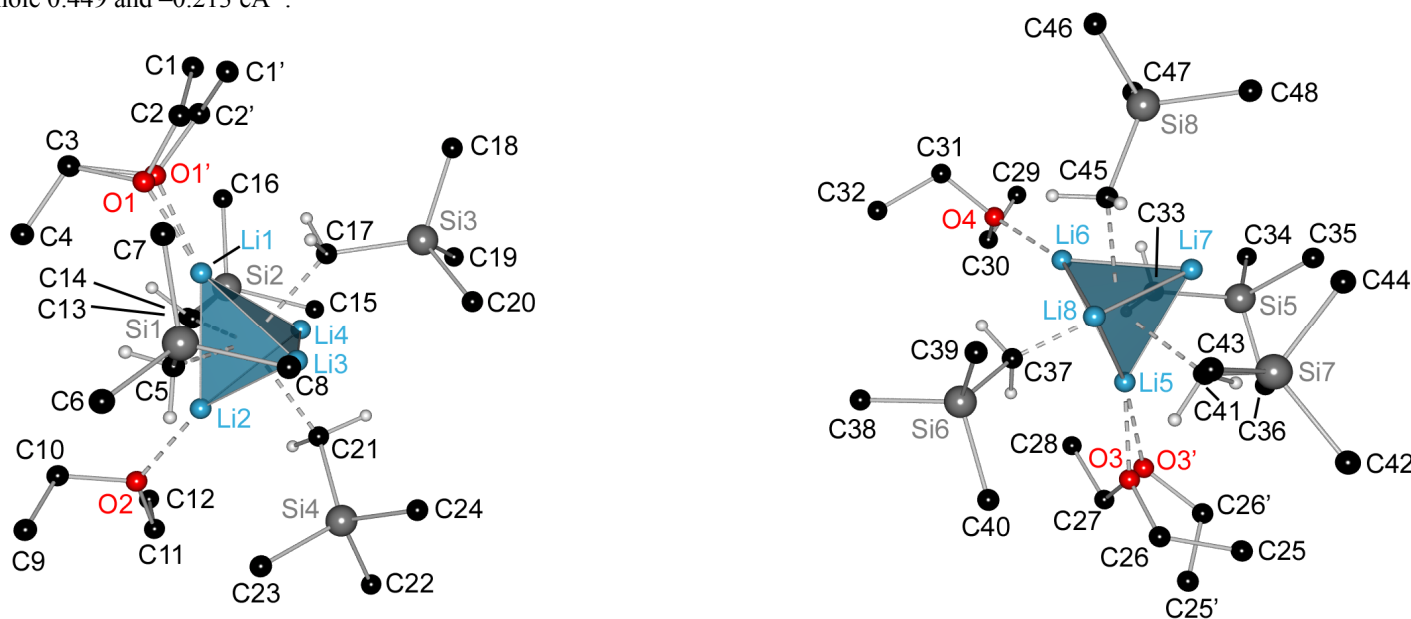

**Figure 2** Molecular structure of [(Et<sub>2</sub>O)<sub>2</sub>·(LiCH<sub>2</sub>SiMe<sub>3</sub>)<sub>4</sub>] (**1**) in the crystal (asymmetric unit) including disordered sites.

**Table 1.** Bond lengths [Å] and angles [°] for **1**.

|             |          |             |          |
|-------------|----------|-------------|----------|
| Li(1)-O(1)  | 1.978(3) | Li(1)-Li(2) | 2.672(3) |
| Li(1)-O(1') | 2.005(8) | Li(2)-O(2)  | 1.953(2) |
| Li(1)-C(13) | 2.287(3) | Li(2)-C(5)  | 2.266(3) |
| Li(1)-C(5)  | 2.292(3) | Li(2)-C(21) | 2.291(3) |
| Li(1)-C(17) | 2.340(3) | Li(2)-C(13) | 2.298(3) |
| Li(1)-Li(3) | 2.569(3) | Li(2)-Li(3) | 2.523(3) |
| Li(1)-Li(4) | 2.580(3) | Li(2)-Li(4) | 2.559(3) |

The first asymmetric organolithium tetramers with simple ether donor bases

Tanja Tatic<sup>a</sup>, Kathrin Meindl<sup>a</sup>, Julian Henn<sup>a</sup>, Sushil Kumar Pandey<sup>b</sup>, and Dietmar Stalke<sup>\*a</sup>

---

|             |            |             |            |
|-------------|------------|-------------|------------|
| Li(3)-C(5)  | 2.222(3)   | Si(2)-C(15) | 1.8884(18) |
| Li(3)-C(21) | 2.244(3)   | Si(3)-C(17) | 1.8414(14) |
| Li(3)-C(17) | 2.247(3)   | Si(3)-C(18) | 1.8831(15) |
| Li(3)-Li(4) | 2.420(3)   | Si(3)-C(20) | 1.8834(16) |
| Li(4)-C(17) | 2.203(3)   | Si(3)-C(19) | 1.8839(18) |
| Li(4)-C(13) | 2.214(3)   | Si(4)-C(21) | 1.8493(15) |
| Li(4)-C(21) | 2.255(3)   | Si(4)-C(23) | 1.8820(16) |
| Li(5)-O(3)  | 1.996(3)   | Si(4)-C(24) | 1.8832(18) |
| Li(5)-O(3') | 2.019(6)   | Si(4)-C(22) | 1.8834(17) |
| Li(5)-C(37) | 2.291(3)   | Si(5)-C(33) | 1.8407(15) |
| Li(5)-C(33) | 2.309(3)   | Si(5)-C(36) | 1.8808(16) |
| Li(5)-C(41) | 2.313(3)   | Si(5)-C(34) | 1.8814(18) |
| Li(5)-Li(8) | 2.575(3)   | Si(5)-C(35) | 1.8952(18) |
| Li(5)-Li(7) | 2.580(3)   | Si(6)-C(37) | 1.8383(15) |
| Li(5)-Li(6) | 2.672(3)   | Si(6)-C(40) | 1.8635(18) |
| Li(6)-O(4)  | 1.956(2)   | Si(6)-C(38) | 1.8817(18) |
| Li(6)-C(33) | 2.259(3)   | Si(6)-C(39) | 1.8927(18) |
| Li(6)-C(45) | 2.296(3)   | Si(7)-C(41) | 1.8395(15) |
| Li(6)-C(37) | 2.303(3)   | Si(7)-C(43) | 1.8793(18) |
| Li(6)-Li(7) | 2.527(3)   | Si(7)-C(44) | 1.8818(16) |
| Li(6)-Li(8) | 2.569(3)   | Si(7)-C(42) | 1.8880(15) |
| Li(7)-C(33) | 2.219(3)   | Si(8)-C(45) | 1.8480(15) |
| Li(7)-C(41) | 2.230(3)   | Si(8)-C(47) | 1.8759(16) |
| Li(7)-C(45) | 2.254(3)   | Si(8)-C(48) | 1.8805(18) |
| Li(7)-Li(8) | 2.416(3)   | Si(8)-C(46) | 1.8828(17) |
| Li(8)-C(37) | 2.204(3)   | C(4)-C(3)   | 1.502(3)   |
| Li(8)-C(41) | 2.211(3)   | C(3)-O(1)   | 1.418(3)   |
| Li(8)-C(45) | 2.227(3)   | C(3)-O(1')  | 1.516(8)   |
| Si(1)-C(5)  | 1.8422(14) | O(1)-C(2)   | 1.430(2)   |
| Si(1)-C(7)  | 1.8761(16) | C(2)-C(1)   | 1.499(3)   |
| Si(1)-C(6)  | 1.8810(18) | O(1')-C(2') | 1.456(9)   |
| Si(1)-C(8)  | 1.8911(17) | C(2')-C(1') | 1.509(10)  |
| Si(2)-C(13) | 1.8387(15) | O(4)-C(30)  | 1.4385(17) |
| Si(2)-C(16) | 1.8702(17) | O(4)-C(31)  | 1.4401(16) |
| Si(2)-C(14) | 1.8798(17) | C(31)-C(32) | 1.507(2)   |

The first asymmetric organolithium tetramers with simple ether donor bases

Tanja Tatic<sup>a</sup>, Kathrin Meindl<sup>a</sup>, Julian Henn<sup>a</sup>, Sushil Kumar Pandey<sup>b</sup>, and Dietmar Stalke<sup>\*a</sup>

---

|                   |            |                   |            |
|-------------------|------------|-------------------|------------|
| C(30)-C(29)       | 1.506(2)   | C(5)-Li(1)-Li(2)  | 53.64(7)   |
| C(28)-C(27)       | 1.486(3)   | C(17)-Li(1)-Li(2) | 100.71(9)  |
| C(27)-O(3)        | 1.470(3)   | Li(3)-Li(1)-Li(2) | 57.50(8)   |
| O(3)-C(26)        | 1.441(3)   | Li(4)-Li(1)-Li(2) | 58.27(8)   |
| C(26)-C(25)       | 1.529(4)   | O(2)-Li(2)-C(5)   | 116.03(11) |
| O(3')-C(26')      | 1.417(8)   | O(2)-Li(2)-C(21)  | 114.20(10) |
| C(26')-C(25')     | 1.439(9)   | C(5)-Li(2)-C(21)  | 106.58(10) |
| C(9)-C(10)        | 1.502(2)   | O(2)-Li(2)-C(13)  | 107.63(11) |
| C(10)-O(2)        | 1.4439(17) | C(5)-Li(2)-C(13)  | 106.41(9)  |
| O(2)-C(11)        | 1.4382(16) | C(21)-Li(2)-C(13) | 105.20(9)  |
| C(11)-C(12)       | 1.514(2)   | O(2)-Li(2)-Li(3)  | 152.29(11) |
| O(1)-Li(1)-O(1')  | 14.96(17)  | C(5)-Li(2)-Li(3)  | 54.98(7)   |
| O(1)-Li(1)-C(13)  | 116.36(12) | C(21)-Li(2)-Li(3) | 55.32(8)   |
| O(1')-Li(1)-C(13) | 105.3(2)   | C(13)-Li(2)-Li(3) | 100.05(9)  |
| O(1)-Li(1)-C(5)   | 114.69(12) | O(2)-Li(2)-Li(4)  | 142.82(11) |
| O(1')-Li(1)-C(5)  | 129.3(2)   | C(5)-Li(2)-Li(4)  | 100.83(9)  |
| C(13)-Li(1)-C(5)  | 105.90(9)  | C(21)-Li(2)-Li(4) | 55.08(7)   |
| O(1)-Li(1)-C(17)  | 110.40(11) | C(13)-Li(2)-Li(4) | 53.93(8)   |
| O(1')-Li(1)-C(17) | 105.3(2)   | Li(3)-Li(2)-Li(4) | 56.87(8)   |
| C(13)-Li(1)-C(17) | 103.16(10) | O(2)-Li(2)-Li(1)  | 141.52(11) |
| C(5)-Li(1)-C(17)  | 105.17(9)  | C(5)-Li(2)-Li(1)  | 54.56(7)   |
| O(1)-Li(1)-Li(3)  | 144.46(12) | C(21)-Li(2)-Li(1) | 103.82(9)  |
| O(1')-Li(1)-Li(3) | 151.7(2)   | C(13)-Li(2)-Li(1) | 54.17(8)   |
| C(13)-Li(1)-Li(3) | 98.99(10)  | Li(3)-Li(2)-Li(1) | 59.19(7)   |
| C(5)-Li(1)-Li(3)  | 54.04(7)   | Li(4)-Li(2)-Li(1) | 59.05(9)   |
| C(17)-Li(1)-Li(3) | 54.25(8)   | C(5)-Li(3)-C(21)  | 109.78(10) |
| O(1)-Li(1)-Li(4)  | 145.54(13) | C(5)-Li(3)-C(17)  | 110.81(10) |
| O(1')-Li(1)-Li(4) | 131.2(2)   | C(21)-Li(3)-C(17) | 108.97(10) |
| C(13)-Li(1)-Li(4) | 53.72(8)   | C(5)-Li(3)-Li(4)  | 106.57(10) |
| C(5)-Li(1)-Li(4)  | 99.49(9)   | C(21)-Li(3)-Li(4) | 57.68(8)   |
| C(17)-Li(1)-Li(4) | 52.94(7)   | C(17)-Li(3)-Li(4) | 56.19(8)   |
| Li(3)-Li(1)-Li(4) | 56.06(8)   | C(5)-Li(3)-Li(2)  | 56.62(8)   |
| O(1)-Li(1)-Li(2)  | 148.88(12) | C(21)-Li(3)-Li(2) | 57.11(7)   |
| O(1')-Li(1)-Li(2) | 150.5(2)   | C(17)-Li(3)-Li(2) | 108.14(9)  |
| C(13)-Li(1)-Li(2) | 54.54(7)   | Li(4)-Li(3)-Li(2) | 62.32(9)   |

The first asymmetric organolithium tetramers with simple ether donor bases

Tanja Tatic<sup>a</sup>, Kathrin Meindl<sup>a</sup>, Julian Henn<sup>a</sup>, Sushil Kumar Pandey<sup>b</sup>, and Dietmar Stalke<sup>\*a</sup>

---

|                   |            |                   |            |
|-------------------|------------|-------------------|------------|
| C(5)-Li(3)-Li(1)  | 56.61(8)   | O(3)-Li(5)-Li(7)  | 149.39(13) |
| C(21)-Li(3)-Li(1) | 108.63(10) | O(3')-Li(5)-Li(7) | 140.7(2)   |
| C(17)-Li(3)-Li(1) | 57.67(7)   | C(37)-Li(5)-Li(7) | 98.62(10)  |
| Li(4)-Li(3)-Li(1) | 62.20(9)   | C(33)-Li(5)-Li(7) | 53.62(8)   |
| Li(2)-Li(3)-Li(1) | 63.32(9)   | C(41)-Li(5)-Li(7) | 53.88(8)   |
| C(17)-Li(4)-C(13) | 110.31(11) | Li(8)-Li(5)-Li(7) | 55.89(8)   |
| C(17)-Li(4)-C(21) | 110.17(10) | O(3)-Li(5)-Li(6)  | 151.90(13) |
| C(13)-Li(4)-C(21) | 109.34(9)  | O(3')-Li(5)-Li(6) | 147.5(2)   |
| C(17)-Li(4)-Li(3) | 57.94(8)   | C(37)-Li(5)-Li(6) | 54.64(7)   |
| C(13)-Li(4)-Li(3) | 105.77(11) | C(33)-Li(5)-Li(6) | 53.35(8)   |
| C(21)-Li(4)-Li(3) | 57.25(8)   | C(41)-Li(5)-Li(6) | 101.07(10) |
| C(17)-Li(4)-Li(2) | 108.31(10) | Li(8)-Li(5)-Li(6) | 58.60(8)   |
| C(13)-Li(4)-Li(2) | 57.02(7)   | Li(7)-Li(5)-Li(6) | 57.47(8)   |
| C(21)-Li(4)-Li(2) | 56.43(8)   | O(4)-Li(6)-C(33)  | 112.04(11) |
| Li(3)-Li(4)-Li(2) | 60.82(9)   | O(4)-Li(6)-C(45)  | 117.69(10) |
| C(17)-Li(4)-Li(1) | 57.93(8)   | C(33)-Li(6)-C(45) | 106.91(11) |
| C(13)-Li(4)-Li(1) | 56.38(8)   | O(4)-Li(6)-C(37)  | 108.80(11) |
| C(21)-Li(4)-Li(1) | 107.92(10) | C(33)-Li(6)-C(37) | 107.24(9)  |
| Li(3)-Li(4)-Li(1) | 61.74(9)   | C(45)-Li(6)-C(37) | 103.40(9)  |
| Li(2)-Li(4)-Li(1) | 62.68(8)   | O(4)-Li(6)-Li(7)  | 151.24(12) |
| O(3)-Li(5)-O(3')  | 16.37(18)  | C(33)-Li(6)-Li(7) | 54.89(8)   |
| O(3)-Li(5)-C(37)  | 109.01(12) | C(45)-Li(6)-Li(7) | 55.48(8)   |
| O(3')-Li(5)-C(37) | 120.7(2)   | C(37)-Li(6)-Li(7) | 99.86(9)   |
| O(3)-Li(5)-C(33)  | 126.48(13) | O(4)-Li(6)-Li(8)  | 146.83(12) |
| O(3')-Li(5)-C(33) | 110.3(2)   | C(33)-Li(6)-Li(8) | 100.64(10) |
| C(37)-Li(5)-C(33) | 105.99(9)  | C(45)-Li(6)-Li(8) | 54.15(7)   |
| O(3)-Li(5)-C(41)  | 105.40(12) | C(37)-Li(6)-Li(8) | 53.45(8)   |
| O(3')-Li(5)-C(41) | 110.8(2)   | Li(7)-Li(6)-Li(8) | 56.60(8)   |
| C(37)-Li(5)-C(41) | 103.62(11) | O(4)-Li(6)-Li(5)  | 138.66(11) |
| C(33)-Li(5)-C(41) | 104.11(10) | C(33)-Li(6)-Li(5) | 55.06(8)   |
| O(3)-Li(5)-Li(8)  | 134.24(13) | C(45)-Li(6)-Li(5) | 103.44(10) |
| O(3')-Li(5)-Li(8) | 149.8(2)   | C(37)-Li(6)-Li(5) | 54.23(8)   |
| C(37)-Li(5)-Li(8) | 53.48(8)   | Li(7)-Li(6)-Li(5) | 59.44(8)   |
| C(33)-Li(5)-Li(8) | 99.14(9)   | Li(8)-Li(6)-Li(5) | 58.80(9)   |
| C(41)-Li(5)-Li(8) | 53.46(7)   | C(33)-Li(7)-C(41) | 110.03(9)  |

The first asymmetric organolithium tetramers with simple ether donor bases

Tanja Tatic<sup>a</sup>, Kathrin Meindl<sup>a</sup>, Julian Henn<sup>a</sup>, Sushil Kumar Pandey<sup>b</sup>, and Dietmar Stalke<sup>\*a</sup>

---

|                   |            |                   |           |
|-------------------|------------|-------------------|-----------|
| C(33)-Li(7)-C(45) | 109.82(10) | C(13)-Si(2)-C(16) | 111.30(8) |
| C(41)-Li(7)-C(45) | 109.03(10) | C(13)-Si(2)-C(14) | 115.67(6) |
| C(33)-Li(7)-Li(8) | 106.75(11) | C(16)-Si(2)-C(14) | 107.52(8) |
| C(41)-Li(7)-Li(8) | 56.66(8)   | C(13)-Si(2)-C(15) | 109.65(7) |
| C(45)-Li(7)-Li(8) | 56.85(8)   | C(16)-Si(2)-C(15) | 106.61(9) |
| C(33)-Li(7)-Li(6) | 56.42(8)   | C(14)-Si(2)-C(15) | 105.57(8) |
| C(41)-Li(7)-Li(6) | 108.13(10) | C(17)-Si(3)-C(18) | 114.83(7) |
| C(45)-Li(7)-Li(6) | 57.06(7)   | C(17)-Si(3)-C(20) | 109.95(7) |
| Li(8)-Li(7)-Li(6) | 62.59(9)   | C(18)-Si(3)-C(20) | 107.56(8) |
| C(33)-Li(7)-Li(5) | 56.91(8)   | C(17)-Si(3)-C(19) | 112.09(7) |
| C(41)-Li(7)-Li(5) | 56.92(8)   | C(18)-Si(3)-C(19) | 104.56(8) |
| C(45)-Li(7)-Li(5) | 107.64(10) | C(20)-Si(3)-C(19) | 107.44(8) |
| Li(8)-Li(7)-Li(5) | 61.93(10)  | C(21)-Si(4)-C(23) | 112.35(7) |
| Li(6)-Li(7)-Li(5) | 63.09(9)   | C(21)-Si(4)-C(24) | 111.22(6) |
| C(37)-Li(8)-C(41) | 110.11(11) | C(23)-Si(4)-C(24) | 105.58(6) |
| C(37)-Li(8)-C(45) | 109.06(10) | C(21)-Si(4)-C(22) | 114.30(6) |
| C(41)-Li(8)-C(45) | 110.69(10) | C(23)-Si(4)-C(22) | 106.03(8) |
| C(37)-Li(8)-Li(7) | 106.29(11) | C(24)-Si(4)-C(22) | 106.78(7) |
| C(41)-Li(8)-Li(7) | 57.43(9)   | C(33)-Si(5)-C(36) | 112.26(7) |
| C(45)-Li(8)-Li(7) | 57.90(8)   | C(33)-Si(5)-C(34) | 115.23(7) |
| C(37)-Li(8)-Li(6) | 57.09(8)   | C(36)-Si(5)-C(34) | 106.42(9) |
| C(41)-Li(8)-Li(6) | 107.29(11) | C(33)-Si(5)-C(35) | 109.07(8) |
| C(45)-Li(8)-Li(6) | 56.65(8)   | C(36)-Si(5)-C(35) | 107.45(7) |
| Li(7)-Li(8)-Li(6) | 60.82(9)   | C(34)-Si(5)-C(35) | 105.97(9) |
| C(37)-Li(8)-Li(5) | 56.67(8)   | C(37)-Si(6)-C(40) | 111.78(8) |
| C(41)-Li(8)-Li(5) | 57.21(8)   | C(37)-Si(6)-C(38) | 114.80(7) |
| C(45)-Li(8)-Li(5) | 108.67(10) | C(40)-Si(6)-C(38) | 107.02(8) |
| Li(7)-Li(8)-Li(5) | 62.18(9)   | C(37)-Si(6)-C(39) | 109.87(7) |
| Li(6)-Li(8)-Li(5) | 62.60(8)   | C(40)-Si(6)-C(39) | 107.46(9) |
| C(5)-Si(1)-C(7)   | 112.51(7)  | C(38)-Si(6)-C(39) | 105.47(8) |
| C(5)-Si(1)-C(6)   | 115.14(7)  | C(41)-Si(7)-C(43) | 109.81(8) |
| C(7)-Si(1)-C(6)   | 106.13(9)  | C(41)-Si(7)-C(44) | 111.14(7) |
| C(5)-Si(1)-C(8)   | 109.07(8)  | C(43)-Si(7)-C(44) | 108.43(8) |
| C(7)-Si(1)-C(8)   | 106.84(7)  | C(41)-Si(7)-C(42) | 114.62(7) |
| C(6)-Si(1)-C(8)   | 106.69(9)  | C(43)-Si(7)-C(42) | 105.51(8) |

The first asymmetric organolithium tetramers with simple ether donor bases

Tanja Tatic<sup>a</sup>, Kathrin Meindl<sup>a</sup>, Julian Henn<sup>a</sup>, Sushil Kumar Pandey<sup>b</sup>, and Dietmar Stalke<sup>\*a</sup>

---

|                   |            |                   |            |
|-------------------|------------|-------------------|------------|
| C(44)-Si(7)-C(42) | 107.03(8)  | Li(2)-C(5)-Li(1)  | 71.80(8)   |
| C(45)-Si(8)-C(47) | 111.85(7)  | Si(5)-C(33)-Li(7) | 96.81(9)   |
| C(45)-Si(8)-C(48) | 111.63(6)  | Si(5)-C(33)-Li(6) | 162.63(9)  |
| C(47)-Si(8)-C(48) | 105.99(7)  | Li(7)-C(33)-Li(6) | 68.69(9)   |
| C(45)-Si(8)-C(46) | 114.84(6)  | Si(5)-C(33)-Li(5) | 113.29(8)  |
| C(47)-Si(8)-C(46) | 106.18(8)  | Li(7)-C(33)-Li(5) | 69.46(8)   |
| C(48)-Si(8)-C(46) | 105.75(7)  | Li(6)-C(33)-Li(5) | 71.59(8)   |
| O(1)-C(3)-C(4)    | 107.74(15) | Si(3)-C(17)-Li(4) | 108.76(9)  |
| O(1)-C(3)-O(1')   | 20.0(2)    | Si(3)-C(17)-Li(3) | 112.55(8)  |
| C(4)-C(3)-O(1')   | 117.1(3)   | Li(4)-C(17)-Li(3) | 65.87(8)   |
| C(3)-O(1)-C(2)    | 110.98(17) | Si(3)-C(17)-Li(1) | 177.47(9)  |
| C(3)-O(1)-Li(1)   | 126.68(15) | Li(4)-C(17)-Li(1) | 69.13(9)   |
| C(2)-O(1)-Li(1)   | 121.47(15) | Li(3)-C(17)-Li(1) | 68.09(8)   |
| O(1)-C(2)-C(1)    | 113.14(18) | Si(7)-C(41)-Li(8) | 110.31(10) |
| C(2')-O(1')-C(3)  | 118.6(6)   | Si(7)-C(41)-Li(7) | 113.93(8)  |
| C(2')-O(1')-Li(1) | 122.3(5)   | Li(8)-C(41)-Li(7) | 65.92(8)   |
| C(3)-O(1')-Li(1)  | 119.1(4)   | Si(7)-C(41)-Li(5) | 176.56(9)  |
| O(1')-C(2')-C(1') | 115.0(6)   | Li(8)-C(41)-Li(5) | 69.34(10)  |
| Si(2)-C(13)-Li(4) | 88.69(8)   | Li(7)-C(41)-Li(5) | 69.19(8)   |
| Si(2)-C(13)-Li(1) | 128.23(8)  | Si(6)-C(37)-Li(8) | 90.24(8)   |
| Li(4)-C(13)-Li(1) | 69.90(10)  | Si(6)-C(37)-Li(5) | 128.14(9)  |
| Si(2)-C(13)-Li(2) | 144.07(9)  | Li(8)-C(37)-Li(5) | 69.85(10)  |
| Li(4)-C(13)-Li(2) | 69.05(8)   | Si(6)-C(37)-Li(6) | 146.16(9)  |
| Li(1)-C(13)-Li(2) | 71.29(8)   | Li(8)-C(37)-Li(6) | 69.46(8)   |
| Si(4)-C(21)-Li(3) | 104.71(8)  | Li(5)-C(37)-Li(6) | 71.13(8)   |
| Si(4)-C(21)-Li(4) | 168.33(8)  | C(30)-O(4)-C(31)  | 114.17(10) |
| Li(3)-C(21)-Li(4) | 65.07(8)   | C(30)-O(4)-Li(6)  | 118.40(10) |
| Si(4)-C(21)-Li(2) | 113.94(8)  | C(31)-O(4)-Li(6)  | 126.12(10) |
| Li(3)-C(21)-Li(2) | 67.58(9)   | O(4)-C(31)-C(32)  | 112.83(11) |
| Li(4)-C(21)-Li(2) | 68.49(8)   | O(4)-C(30)-C(29)  | 112.11(11) |
| Si(1)-C(5)-Li(3)  | 96.37(9)   | Si(8)-C(45)-Li(8) | 165.43(9)  |
| Si(1)-C(5)-Li(2)  | 161.24(9)  | Si(8)-C(45)-Li(7) | 102.84(8)  |
| Li(3)-C(5)-Li(2)  | 68.40(9)   | Li(8)-C(45)-Li(7) | 65.24(8)   |
| Si(1)-C(5)-Li(1)  | 114.15(7)  | Si(8)-C(45)-Li(6) | 115.26(8)  |
| Li(3)-C(5)-Li(1)  | 69.36(8)   | Li(8)-C(45)-Li(6) | 69.20(8)   |

The first asymmetric organolithium tetramers with simple ether donor bases

Tanja Tatic<sup>a</sup>, Kathrin Meindl<sup>a</sup>, Julian Henn<sup>a</sup>, Sushil Kumar Pandey<sup>b</sup>, and Dietmar Stalke<sup>\*a</sup>

---

|                    |            |                     |            |
|--------------------|------------|---------------------|------------|
| Li(7)-C(45)-Li(6)  | 67.47(9)   | O(3')-C(26')-C(25') | 116.8(7)   |
| O(3)-C(27)-C(28)   | 112.47(15) | O(2)-C(10)-C(9)     | 112.07(11) |
| C(26)-O(3)-C(27)   | 114.16(17) | C(11)-O(2)-C(10)    | 114.84(10) |
| C(26)-O(3)-Li(5)   | 121.79(16) | C(11)-O(2)-Li(2)    | 127.25(10) |
| C(27)-O(3)-Li(5)   | 124.05(16) | C(10)-O(2)-Li(2)    | 116.51(10) |
| O(3)-C(26)-C(25)   | 112.92(18) | O(2)-C(11)-C(12)    | 112.66(11) |
| C(26')-O(3')-Li(5) | 122.3(5)   |                     |            |

---



# The first asymmetric organolithium tetramers with simple ether donor bases

Tanja Tatic<sup>a</sup>, Kathrin Meindl<sup>a</sup>, Julian Henn<sup>a</sup>, Sushil Kumar Pandey<sup>b</sup>, and Dietmar Stalke<sup>\*a</sup>

## Supplementary Material

### [(<sup>t</sup>BuOMe)<sub>2</sub>·(LiCH<sub>2</sub>SiMe<sub>3</sub>)<sub>4</sub>] (2):

Li<sub>4</sub>C<sub>26</sub>H<sub>68</sub>O<sub>2</sub>Si<sub>4</sub>, *M* = 552.92, orthorhombic, space group *Pna*2<sub>1</sub>, *a* = 21.569(3), *b* = 10.6442(14), *c* = 17.116(2) Å, *V* = 3929.6(9) Å<sup>3</sup>, *Z* = 4, μ(Mo-Kα) = 0.169 mm<sup>-1</sup>, *T* = 100(2) K, 38585 reflections measured, 7279 unique reflections, *R*<sub>int</sub> = 0.0549, 566 parameters refined, *R*<sub>1</sub> (all data) = 0.0725, *R*<sub>1</sub> [*I* > 2σ(*I*)] = 0.0588, *wR*<sub>2</sub> (all data) = 0.1619, *wR*<sub>2</sub> [*I* > 2σ(*I*)] = 0.1520, GOF = 1.079, largest diff. peak and hole 0.594 and -0.225 eÅ<sup>-3</sup>.

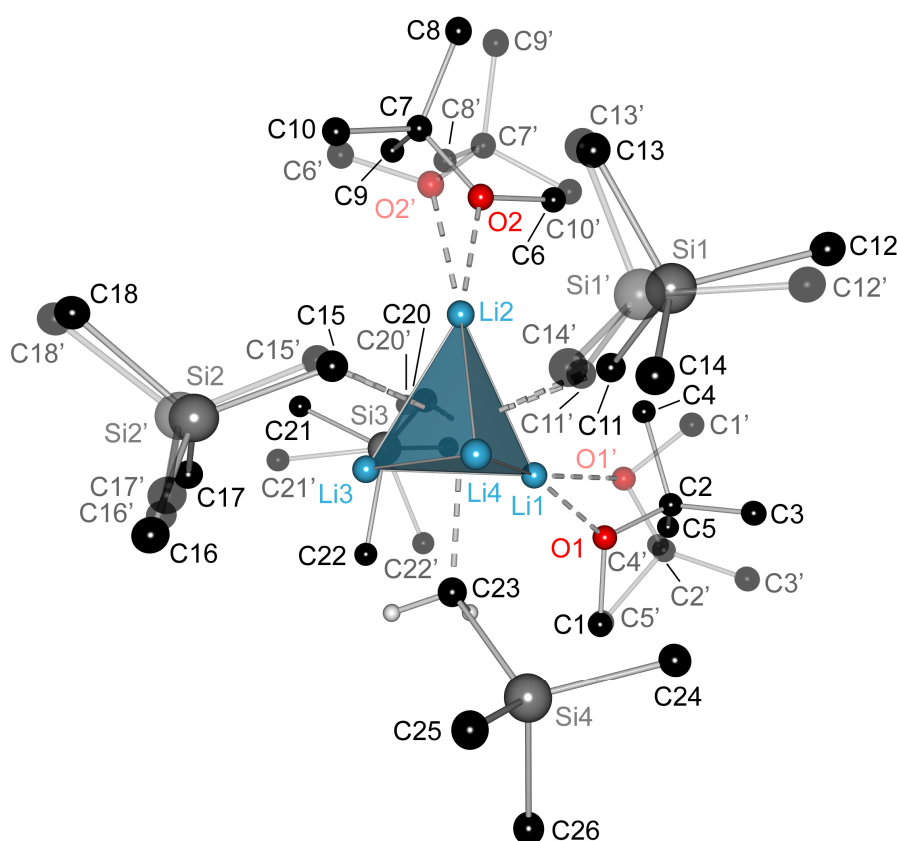

**Figure 3** Molecular structure of [(<sup>t</sup>BuOMe)<sub>2</sub>·(LiCH<sub>2</sub>SiMe<sub>3</sub>)<sub>4</sub>] (2) in the crystal (asymmetric unit) including disordered sites.

**Table 2.** Bond lengths [Å] and angles [°] for 2.

|              |           |              |           |
|--------------|-----------|--------------|-----------|
| Li(1)-O(1)   | 200.1(8)  | Li(2)-C(11') | 207.2(16) |
| Li(1)-O(1')  | 221.0(18) | Li(2)-C(19)  | 229.3(8)  |
| Li(1)-C(11') | 226.8(14) | Li(2)-C(15') | 231.8(15) |
| Li(1)-C(19)  | 234.2(9)  | Li(2)-C(11)  | 234.5(12) |
| Li(1)-C(23)  | 238.1(9)  | Li(2)-C(15)  | 245.5(8)  |
| Li(1)-C(11)  | 239.3(11) | Li(2)-Li(4)  | 254.9(9)  |
| Li(1)-Li(3)  | 255.8(10) | Li(2)-Li(3)  | 262.3(9)  |
| Li(1)-Li(4)  | 257.1(10) | Li(3)-C(15') | 203.2(18) |
| Li(1)-Li(2)  | 271.3(9)  | Li(3)-C(19)  | 215.8(8)  |
| Li(2)-O(2)   | 202.7(7)  | Li(3)-C(23)  | 220.4(7)  |
| Li(2)-O(2')  | 205.2(15) | Li(3)-C(15)  | 227.4(8)  |

# The first asymmetric organolithium tetramers with simple ether donor bases

Tanja Tatic<sup>a</sup>, Kathrin Meindl<sup>a</sup>, Julian Henn<sup>a</sup>, Sushil Kumar Pandey<sup>b</sup>, and Dietmar Stalke<sup>\*a</sup>

## Supplementary Material

|               |           |                    |           |
|---------------|-----------|--------------------|-----------|
| Li(3)-Li(4)   | 237.6(9)  | Si(1')-C(12')      | 185.3(11) |
| Li(3)-Si(2')  | 296.8(15) | Si(1')-C(13')      | 186.0(11) |
| Li(4)-C(11')  | 190.9(16) | Si(1')-C(14')      | 190.1(11) |
| Li(4)-C(15)   | 213.3(8)  | C(15)-Si(2)        | 181.30    |
| Li(4)-C(23)   | 218.7(8)  | Si(2)-C(16)        | 182.8(8)  |
| Li(4)-C(11)   | 230.7(11) | Si(2)-C(18)        | 188.59    |
| Li(4)-C(15')  | 246.5(19) | Si(2)-C(17)        | 191.2(7)  |
| Li(4)-C(14')  | 268.4(15) | C(15')-Si(2')      | 188.0(11) |
| O(1)-C(1)     | 142.5(9)  | Si(2')-C(16')      | 186.8(12) |
| O(1)-C(2)     | 146.3(7)  | Si(2')-C(18')      | 187.3(12) |
| C(2)-C(4)     | 145.1(8)  | Si(2')-C(17')      | 190.5(12) |
| C(2)-C(3)     | 146.1(9)  | C(19)-Si(3)        | 185.7(4)  |
| C(2)-C(5)     | 166.3(10) | Si(3)-C(21)        | 183.8(7)  |
| O(1')-C(1')   | 145.2(13) | Si(3)-C(22')       | 186.4(12) |
| O(1')-C(2')   | 147.8(11) | Si(3)-C(20)        | 186.9(7)  |
| C(2')-C(4')   | 146.0(13) | Si(3)-C(21')       | 188.2(12) |
| C(2')-C(3')   | 146.4(13) | Si(3)-C(22)        | 188.7(6)  |
| C(2')-C(5')   | 166.0(14) | Si(3)-C(20')       | 189.0(12) |
| O(2)-C(6)     | 140.8(12) | O(1)-Li(1)-O(1')   | 29.1(4)   |
| O(2)-C(7)     | 145.7(6)  | O(1)-Li(1)-C(11')  | 128.6(5)  |
| C(7)-C(9)     | 152.2(8)  | O(1')-Li(1)-C(11') | 111.9(6)  |
| C(7)-C(8)     | 152.7(9)  | O(1)-Li(1)-C(19)   | 116.6(4)  |
| C(7)-C(10)    | 153.4(11) | O(1')-Li(1)-C(19)  | 103.8(6)  |
| O(2')-C(6')   | 141(2)    | C(11')-Li(1)-C(19) | 101.3(5)  |
| O(2')-C(7')   | 146.5(16) | O(1)-Li(1)-C(23)   | 107.5(4)  |
| C(7')-C(9')   | 152.7(19) | O(1')-Li(1)-C(23)  | 136.5(6)  |
| C(7')-C(8')   | 154.0(18) | C(11')-Li(1)-C(23) | 96.0(5)   |
| C(7')-C(10')  | 154(2)    | C(19)-Li(1)-C(23)  | 102.5(3)  |
| C(23)-Si(4)   | 187.3(4)  | O(1)-Li(1)-C(11)   | 118.9(4)  |
| Si(4)-C(25)   | 186.7(5)  | O(1')-Li(1)-C(11)  | 101.9(5)  |
| Si(4)-C(24)   | 188.1(4)  | C(11')-Li(1)-C(11) | 10.2(4)   |
| Si(4)-C(26)   | 188.1(4)  | C(19)-Li(1)-C(11)  | 105.9(4)  |
| C(11)-Si(1)   | 188.5(8)  | C(23)-Li(1)-C(11)  | 103.5(4)  |
| Si(1)-C(13)   | 186.0(9)  | O(1)-Li(1)-Li(3)   | 139.7(4)  |
| Si(1)-C(12)   | 187.1(8)  | O(1')-Li(1)-Li(3)  | 150.9(6)  |
| Si(1)-C(14)   | 188.3(8)  | C(11')-Li(1)-Li(3) | 90.8(5)   |
| C(11')-Si(1') | 196.2(11) | C(19)-Li(1)-Li(3)  | 52.0(2)   |

# The first asymmetric organolithium tetramers with simple ether donor bases

Tanja Tatic<sup>a</sup>, Kathrin Meindl<sup>a</sup>, Julian Henn<sup>a</sup>, Sushil Kumar Pandey<sup>b</sup>, and Dietmar Stalke<sup>\*a</sup>

## Supplementary Material

---

|                     |          |                    |          |
|---------------------|----------|--------------------|----------|
| C(23)-Li(1)-Li(3)   | 52.8(2)  | C(11)-Li(2)-C(15)  | 102.6(3) |
| C(11)-Li(1)-Li(3)   | 100.8(4) | O(2)-Li(2)-Li(4)   | 157.6(4) |
| O(1)-Li(1)-Li(4)    | 145.9(4) | O(2')-Li(2)-Li(4)  | 150.3(5) |
| O(1')-Li(1)-Li(4)   | 153.6(6) | C(11')-Li(2)-Li(4) | 47.4(5)  |
| C(11')-Li(1)-Li(4)  | 46.0(4)  | C(19)-Li(2)-Li(4)  | 97.9(3)  |
| C(19)-Li(1)-Li(4)   | 96.0(3)  | C(15')-Li(2)-Li(4) | 60.6(5)  |
| C(23)-Li(1)-Li(4)   | 52.2(2)  | C(11)-Li(2)-Li(4)  | 56.1(3)  |
| C(11)-Li(1)-Li(4)   | 55.3(3)  | C(15)-Li(2)-Li(4)  | 50.4(2)  |
| Li(3)-Li(1)-Li(4)   | 55.2(2)  | O(2)-Li(2)-Li(3)   | 147.3(4) |
| O(1)-Li(1)-Li(2)    | 151.8(4) | O(2')-Li(2)-Li(3)  | 133.9(5) |
| O(1')-Li(1)-Li(2)   | 122.9(5) | C(11')-Li(2)-Li(3) | 93.6(5)  |
| C(11')-Li(1)-Li(2)  | 48.1(4)  | C(19)-Li(2)-Li(3)  | 51.5(2)  |
| C(19)-Li(1)-Li(2)   | 53.3(2)  | C(15')-Li(2)-Li(3) | 48.1(5)  |
| C(23)-Li(1)-Li(2)   | 100.6(3) | C(11)-Li(2)-Li(3)  | 100.3(4) |
| C(11)-Li(1)-Li(2)   | 54.2(3)  | C(15)-Li(2)-Li(3)  | 53.1(2)  |
| Li(3)-Li(1)-Li(2)   | 59.6(2)  | Li(4)-Li(2)-Li(3)  | 54.7(2)  |
| Li(4)-Li(1)-Li(2)   | 57.6(2)  | O(2)-Li(2)-Li(1)   | 129.8(4) |
| O(2)-Li(2)-O(2')    | 23.6(4)  | O(2')-Li(2)-Li(1)  | 150.8(6) |
| O(2)-Li(2)-C(11')   | 116.3(5) | C(11')-Li(2)-Li(1) | 54.6(4)  |
| O(2')-Li(2)-C(11')  | 132.0(6) | C(19)-Li(2)-Li(1)  | 55.0(2)  |
| O(2)-Li(2)-C(19)    | 103.0(3) | C(15')-Li(2)-Li(1) | 101.1(5) |
| O(2')-Li(2)-C(19)   | 107.3(5) | C(11)-Li(2)-Li(1)  | 55.9(3)  |
| C(11')-Li(2)-C(19)  | 109.4(5) | C(15)-Li(2)-Li(1)  | 99.0(3)  |
| O(2)-Li(2)-C(15')   | 126.1(6) | Li(4)-Li(2)-Li(1)  | 58.4(3)  |
| O(2')-Li(2)-C(15')  | 102.5(7) | Li(3)-Li(2)-Li(1)  | 57.3(3)  |
| C(11')-Li(2)-C(15') | 106.5(7) | C(15')-Li(3)-C(19) | 103.8(6) |
| C(19)-Li(2)-C(15')  | 91.3(5)  | C(15')-Li(3)-C(23) | 118.5(7) |
| O(2)-Li(2)-C(11)    | 108.5(4) | C(19)-Li(3)-C(23)  | 115.3(4) |
| O(2')-Li(2)-C(11)   | 125.8(6) | C(15')-Li(3)-C(15) | 14.2(6)  |
| C(11')-Li(2)-C(11)  | 8.7(5)   | C(19)-Li(3)-C(15)  | 111.9(3) |
| C(19)-Li(2)-C(11)   | 109.2(4) | C(23)-Li(3)-C(15)  | 104.3(3) |
| C(15')-Li(2)-C(11)  | 115.2(6) | C(15')-Li(3)-Li(4) | 67.5(6)  |
| O(2)-Li(2)-C(15)    | 130.9(4) | C(19)-Li(3)-Li(4)  | 107.3(3) |
| O(2')-Li(2)-C(15)   | 107.9(5) | C(23)-Li(3)-Li(4)  | 56.9(3)  |
| C(11')-Li(2)-C(15)  | 94.2(5)  | C(15)-Li(3)-Li(4)  | 54.5(3)  |
| C(19)-Li(2)-C(15)   | 101.3(3) | C(15')-Li(3)-Li(1) | 115.5(5) |
| C(15')-Li(2)-C(15)  | 13.7(5)  | C(19)-Li(3)-Li(1)  | 58.8(3)  |

# The first asymmetric organolithium tetramers with simple ether donor bases

Tanja Tatic<sup>a</sup>, Kathrin Meindl<sup>a</sup>, Julian Henn<sup>a</sup>, Sushil Kumar Pandey<sup>b</sup>, and Dietmar Stalke<sup>\*a</sup>

## Supplementary Material

|                     |          |                     |           |
|---------------------|----------|---------------------|-----------|
| C(23)-Li(3)-Li(1)   | 59.5(3)  | C(11')-Li(4)-Li(1)  | 58.6(4)   |
| C(15)-Li(3)-Li(1)   | 108.8(3) | C(15)-Li(4)-Li(1)   | 113.1(4)  |
| Li(4)-Li(3)-Li(1)   | 62.7(3)  | C(23)-Li(4)-Li(1)   | 59.4(3)   |
| C(15')-Li(3)-Li(2)  | 58.1(4)  | C(11)-Li(4)-Li(1)   | 58.5(3)   |
| C(19)-Li(3)-Li(2)   | 56.3(2)  | Li(3)-Li(4)-Li(1)   | 62.1(3)   |
| C(23)-Li(3)-Li(2)   | 108.5(3) | C(15')-Li(4)-Li(1)  | 101.2(5)  |
| C(15)-Li(3)-Li(2)   | 59.7(2)  | Li(2)-Li(4)-Li(1)   | 64.0(3)   |
| Li(4)-Li(3)-Li(2)   | 61.1(3)  | C(11')-Li(4)-C(14') | 82.4(5)   |
| Li(1)-Li(3)-Li(2)   | 63.1(3)  | C(15)-Li(4)-C(14')  | 95.4(5)   |
| C(15')-Li(3)-Si(2') | 38.8(4)  | C(23)-Li(4)-C(14')  | 139.8(4)  |
| C(19)-Li(3)-Si(2')  | 131.1(4) | C(11)-Li(4)-C(14')  | 81.3(5)   |
| C(23)-Li(3)-Si(2')  | 111.8(4) | Li(3)-Li(4)-C(14')  | 155.6(6)  |
| C(15)-Li(3)-Si(2')  | 41.6(4)  | C(15')-Li(4)-C(14') | 106.4(7)  |
| Li(4)-Li(3)-Si(2')  | 87.4(4)  | Li(2)-Li(4)-C(14')  | 107.5(4)  |
| Li(1)-Li(3)-Si(2')  | 149.1(4) | Li(1)-Li(4)-C(14')  | 137.3(5)  |
| Li(2)-Li(3)-Si(2')  | 96.8(3)  | C(1)-O(1)-C(2)      | 111.1(6)  |
| C(11')-Li(4)-C(15)  | 110.6(6) | C(1)-O(1)-Li(1)     | 121.4(5)  |
| C(11')-Li(4)-C(23)  | 114.9(5) | C(2)-O(1)-Li(1)     | 126.2(4)  |
| C(15)-Li(4)-C(23)   | 109.9(3) | C(4)-C(2)-C(3)      | 114.4(6)  |
| C(11')-Li(4)-C(11)  | 4.6(6)   | C(4)-C(2)-O(1)      | 112.8(6)  |
| C(15)-Li(4)-C(11)   | 115.1(4) | C(3)-C(2)-O(1)      | 114.9(5)  |
| C(23)-Li(4)-C(11)   | 113.0(4) | C(4)-C(2)-C(5)      | 109.3(5)  |
| C(11')-Li(4)-Li(3)  | 106.4(5) | C(3)-C(2)-C(5)      | 103.5(6)  |
| C(15)-Li(4)-Li(3)   | 60.3(3)  | O(1)-C(2)-C(5)      | 100.4(4)  |
| C(23)-Li(4)-Li(3)   | 57.6(2)  | C(1')-O(1')-C(2')   | 103.4(12) |
| C(11)-Li(4)-Li(3)   | 109.2(4) | C(1')-O(1')-Li(1)   | 105.7(15) |
| C(11')-Li(4)-C(15') | 106.5(6) | C(2')-O(1')-Li(1)   | 124.1(12) |
| C(15)-Li(4)-C(15')  | 12.0(4)  | C(4')-C(2')-C(3')   | 112.8(13) |
| C(23)-Li(4)-C(15')  | 102.9(5) | C(4')-C(2')-O(1')   | 109.1(13) |
| C(11)-Li(4)-C(15')  | 111.1(5) | C(3')-C(2')-O(1')   | 120.7(13) |
| Li(3)-Li(4)-C(15')  | 49.6(5)  | C(4')-C(2')-C(5')   | 108.9(14) |
| C(11')-Li(4)-Li(2)  | 53.0(5)  | C(3')-C(2')-C(5')   | 104.1(14) |
| C(15)-Li(4)-Li(2)   | 62.5(3)  | O(1')-C(2')-C(5')   | 99.7(12)  |
| C(23)-Li(4)-Li(2)   | 111.7(3) | C(6)-O(2)-C(7)      | 114.0(6)  |
| C(11)-Li(4)-Li(2)   | 57.5(3)  | C(6)-O(2)-Li(2)     | 114.2(5)  |
| Li(3)-Li(4)-Li(2)   | 64.2(3)  | C(7)-O(2)-Li(2)     | 129.7(4)  |
| C(15')-Li(4)-Li(2)  | 55.1(4)  | O(2)-C(7)-C(9)      | 111.1(5)  |

# The first asymmetric organolithium tetramers with simple ether donor bases

Tanja Tatic<sup>a</sup>, Kathrin Meindl<sup>a</sup>, Julian Henn<sup>a</sup>, Sushil Kumar Pandey<sup>b</sup>, and Dietmar Stalke<sup>\*a</sup>

## Supplementary Material

|                    |           |                      |           |
|--------------------|-----------|----------------------|-----------|
| O(2)-C(7)-C(8)     | 111.8(5)  | C(14)-Si(1)-C(11)    | 109.2(4)  |
| C(9)-C(7)-C(8)     | 111.0(6)  | Li(4)-C(11')-Si(1')  | 95.5(6)   |
| O(2)-C(7)-C(10)    | 104.1(5)  | Li(4)-C(11')-Li(2)   | 79.5(6)   |
| C(9)-C(7)-C(10)    | 109.7(6)  | Si(1')-C(11')-Li(2)  | 112.7(7)  |
| C(8)-C(7)-C(10)    | 109.0(6)  | Li(4)-C(11')-Li(1)   | 75.4(5)   |
| C(6')-O(2')-C(7')  | 108.6(17) | Si(1')-C(11')-Li(1)  | 165.5(9)  |
| C(6')-O(2')-Li(2)  | 120.9(18) | Li(2)-C(11')-Li(1)   | 77.2(5)   |
| C(7')-O(2')-Li(2)  | 123.0(13) | C(12')-Si(1')-C(13') | 108.8(10) |
| O(2')-C(7')-C(9')  | 109.8(17) | C(12')-Si(1')-C(14') | 108.0(9)  |
| O(2')-C(7')-C(8')  | 112.5(14) | C(13')-Si(1')-C(14') | 104.4(10) |
| C(9')-C(7')-C(8')  | 109.3(17) | C(12')-Si(1')-C(11') | 119.3(8)  |
| O(2')-C(7')-C(10') | 103(2)    | C(13')-Si(1')-C(11') | 109.4(10) |
| C(9')-C(7')-C(10') | 109(2)    | C(14')-Si(1')-C(11') | 105.8(6)  |
| C(8')-C(7')-C(10') | 113(2)    | Si(1')-C(14')-Li(4)  | 75.2(5)   |
| Si(4)-C(23)-Li(4)  | 99.4(3)   | Si(2)-C(15)-Li(4)    | 127.1(2)  |
| Si(4)-C(23)-Li(3)  | 161.5(3)  | Si(2)-C(15)-Li(3)    | 87.9(2)   |
| Li(4)-C(23)-Li(3)  | 65.5(3)   | Li(4)-C(15)-Li(3)    | 65.2(3)   |
| Si(4)-C(23)-Li(1)  | 118.2(3)  | Si(2)-C(15)-Li(2)    | 143.7(2)  |
| Li(4)-C(23)-Li(1)  | 68.3(3)   | Li(4)-C(15)-Li(2)    | 67.1(3)   |
| Li(3)-C(23)-Li(1)  | 67.7(3)   | Li(3)-C(15)-Li(2)    | 67.3(3)   |
| C(25)-Si(4)-C(23)  | 108.6(2)  | C(15)-Si(2)-C(16)    | 112.6(4)  |
| C(25)-Si(4)-C(24)  | 107.5(2)  | C(15)-Si(2)-C(18)    | 116.4     |
| C(23)-Si(4)-C(24)  | 112.1(2)  | C(16)-Si(2)-C(18)    | 106.6(4)  |
| C(25)-Si(4)-C(26)  | 108.1(2)  | C(15)-Si(2)-C(17)    | 108.7(3)  |
| C(23)-Si(4)-C(26)  | 115.7(2)  | C(16)-Si(2)-C(17)    | 107.4(5)  |
| C(24)-Si(4)-C(26)  | 104.5(2)  | C(18)-Si(2)-C(17)    | 104.6(3)  |
| Si(1)-C(11)-Li(4)  | 97.3(4)   | Si(2')-C(15')-Li(3)  | 98.6(8)   |
| Si(1)-C(11)-Li(2)  | 111.2(4)  | Si(2')-C(15')-Li(2)  | 171.1(12) |
| Li(4)-C(11)-Li(2)  | 66.4(3)   | Li(3)-C(15')-Li(2)   | 73.8(5)   |
| Si(1)-C(11)-Li(1)  | 162.1(5)  | Si(2')-C(15')-Li(4)  | 117.0(10) |
| Li(4)-C(11)-Li(1)  | 66.3(3)   | Li(3)-C(15')-Li(4)   | 62.9(5)   |
| Li(2)-C(11)-Li(1)  | 69.8(3)   | Li(2)-C(15')-Li(4)   | 64.3(4)   |
| C(13)-Si(1)-C(12)  | 106.3(7)  | C(16')-Si(2')-C(18') | 107.5(10) |
| C(13)-Si(1)-C(14)  | 107.0(7)  | C(16')-Si(2')-C(15') | 109.3(10) |
| C(12)-Si(1)-C(14)  | 108.5(6)  | C(18')-Si(2')-C(15') | 117.2(8)  |
| C(13)-Si(1)-C(11)  | 110.3(6)  | C(16')-Si(2')-C(17') | 106.3(9)  |
| C(12)-Si(1)-C(11)  | 115.2(6)  | C(18')-Si(2')-C(17') | 107.2(10) |

# The first asymmetric organolithium tetramers with simple ether donor bases

Tanja Tatic<sup>a</sup>, Kathrin Meindl<sup>a</sup>, Julian Henn<sup>a</sup>, Sushil Kumar Pandey<sup>b</sup>, and Dietmar Stalke<sup>\*a</sup>

## Supplementary Material

---

|                      |          |                     |           |
|----------------------|----------|---------------------|-----------|
| C(15')-Si(2')-C(17') | 108.8(9) | C(21)-Si(3)-C(21')  | 37.3(10)  |
| C(16')-Si(2')-Li(3)  | 108.6(9) | C(19)-Si(3)-C(21')  | 114.0(9)  |
| C(18')-Si(2')-Li(3)  | 143.4(7) | C(22')-Si(3)-C(21') | 105.9(10) |
| C(15')-Si(2')-Li(3)  | 42.6(6)  | C(20)-Si(3)-C(21')  | 130.5(9)  |
| C(17')-Si(2')-Li(3)  | 68.3(7)  | C(21)-Si(3)-C(22)   | 108.0(5)  |
| Si(3)-C(19)-Li(3)    | 105.4(3) | C(19)-Si(3)-C(22)   | 112.0(3)  |
| Si(3)-C(19)-Li(2)    | 169.5(3) | C(22')-Si(3)-C(22)  | 35.0(10)  |
| Li(3)-C(19)-Li(2)    | 72.2(3)  | C(20)-Si(3)-C(22)   | 102.1(4)  |
| Si(3)-C(19)-Li(1)    | 117.5(3) | C(21')-Si(3)-C(22)  | 74.2(11)  |
| Li(3)-C(19)-Li(1)    | 69.2(3)  | C(21)-Si(3)-C(20')  | 72.7(11)  |
| Li(2)-C(19)-Li(1)    | 71.6(3)  | C(19)-Si(3)-C(20')  | 117.0(8)  |
| C(21)-Si(3)-C(19)    | 113.7(4) | C(22')-Si(3)-C(20') | 102.8(9)  |
| C(21)-Si(3)-C(22')   | 131.3(9) | C(20)-Si(3)-C(20')  | 37.0(10)  |
| C(19)-Si(3)-C(22')   | 111.1(8) | C(21')-Si(3)-C(20') | 104.9(9)  |
| C(21)-Si(3)-C(20)    | 107.4(5) | C(22)-Si(3)-C(20')  | 125.5(10) |
| C(19)-Si(3)-C(20)    | 112.9(3) |                     |           |
| C(22')-Si(3)-C(20)   | 70.4(11) |                     |           |

---

# The first asymmetric organolithium tetramers with simple ether donor bases

Tanja Tatic<sup>a</sup>, Kathrin Meindl<sup>a</sup>, Julian Henn<sup>a</sup>, Sushil Kumar Pandey<sup>b</sup>, and Dietmar Stalke<sup>\*a</sup>

## Supplementary Material

### [(DME)·(LiCH<sub>2</sub>SiMe<sub>3</sub>)<sub>2</sub>] (3):

Li<sub>4</sub>C<sub>16</sub>H<sub>42</sub>O<sub>4</sub>Si<sub>2</sub>, *M* = 368.56, monoclinic, space group *P*2<sub>1</sub>/*c*, *a* = 10.4667(8), *b* = 18.33838(13), *c* = 19.22670(14) Å, *β* = 92.8900°(10), *V* = 3702.6(5) Å<sup>3</sup>, *Z* = 6, *μ*(Mo-Kα) = 0.156 mm<sup>-1</sup>, *T* = 100(2) K, 65904 reflections measured, 7276 unique reflections, *R*<sub>int</sub> = 0.0239, 358 parameters refined, *R*<sub>1</sub> (all data) = 0.0324, *R*<sub>1</sub> [*I* > 2σ(*I*)] = 0.0287, *wR*<sub>2</sub> (all data) = 0.0778, *wR*<sub>2</sub> [*I* > 2σ(*I*)] = 0.0755, GOF = 1.029, largest diff. peak and hole 0.344 and -0.169 eÅ<sup>-3</sup>.

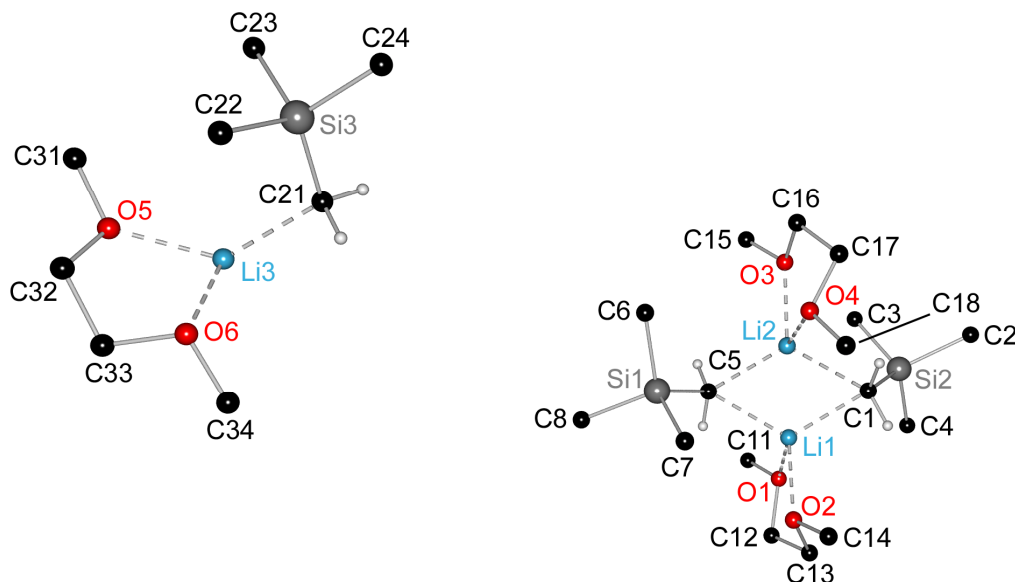

**Figure 4** Molecular structure of [(DME)·(LiCH<sub>2</sub>SiMe<sub>3</sub>)<sub>2</sub>] (3) in the crystal (asymmetric unit).

**Table 3.** Bond lengths [Å] and angles [°] for 3.

|             |            |             |            |
|-------------|------------|-------------|------------|
| Si(1)-C(1)  | 1.8268(11) | O(2)-Li(1)  | 2.041(2)   |
| Si(1)-C(3)  | 1.8825(12) | O(3)-C(16)  | 1.4255(14) |
| Si(1)-C(4)  | 1.8856(12) | O(3)-C(15)  | 1.4258(14) |
| Si(1)-C(2)  | 1.8908(12) | O(3)-Li(2)  | 1.9944(19) |
| Si(2)-C(5)  | 1.8215(11) | O(4)-C(18)  | 1.4264(14) |
| Si(2)-C(6)  | 1.8819(12) | O(4)-C(17)  | 1.4265(13) |
| Si(2)-C(7)  | 1.8844(12) | O(4)-Li(2)  | 2.128(2)   |
| Si(2)-C(8)  | 1.8941(12) | O(5)-C(31)  | 1.4236(14) |
| Si(3)-C(21) | 1.8202(11) | O(5)-C(32)  | 1.4293(14) |
| Si(3)-C(22) | 1.8837(11) | O(5)-Li(3)  | 2.0726(19) |
| Si(3)-C(23) | 1.8870(12) | O(6)-C(34)  | 1.4275(15) |
| Si(3)-C(24) | 1.8960(11) | O(6)-C(33)  | 1.4279(14) |
| O(1)-C(11)  | 1.4175(15) | O(6)-Li(3)  | 2.034(2)   |
| O(1)-C(12)  | 1.4261(14) | Li(1)-C(1)  | 2.196(2)   |
| O(1)-Li(1)  | 2.0374(19) | Li(1)-C(5)  | 2.226(2)   |
| O(2)-C(13)  | 1.4209(13) | Li(1)-C(13) | 2.781(2)   |
| O(2)-C(14)  | 1.4296(14) | Li(2)-C(5)  | 2.213(2)   |

# The first asymmetric organolithium tetramers with simple ether donor bases

Tanja Tatic<sup>a</sup>, Kathrin Meindl<sup>a</sup>, Julian Henn<sup>a</sup>, Sushil Kumar Pandey<sup>b</sup>, and Dietmar Stalke<sup>\*a</sup>

## Supplementary Material

|                   |            |                       |            |
|-------------------|------------|-----------------------|------------|
| Li(2)-C(1)        | 2.261(2)   | C(17)-O(4)-Li(2)      | 103.38(8)  |
| Li(3)-C(21)       | 2.180(2)   | C(31)-O(5)-C(32)      | 112.45(9)  |
| Li(3)-C(21)#1     | 2.256(2)   | C(31)-O(5)-Li(3)      | 128.23(9)  |
| Li(3)-Li(3)#1     | 2.461(3)   | C(32)-O(5)-Li(3)      | 110.80(8)  |
| C(12)-C(13)       | 1.4927(17) | C(34)-O(6)-C(33)      | 112.16(9)  |
| C(16)-C(17)       | 1.4932(17) | C(34)-O(6)-Li(3)      | 121.31(9)  |
| C(21)-Li(3)#1     | 2.256(2)   | C(33)-O(6)-Li(3)      | 108.02(8)  |
| C(32)-C(33)       | 1.4940(17) | O(1)-Li(1)-O(2)       | 82.37(7)   |
| C(1)-Si(1)-C(3)   | 111.56(5)  | O(1)-Li(1)-C(1)       | 120.54(9)  |
| C(1)-Si(1)-C(4)   | 111.69(5)  | O(2)-Li(1)-C(1)       | 110.87(9)  |
| C(3)-Si(1)-C(4)   | 106.81(6)  | O(1)-Li(1)-C(5)       | 109.18(9)  |
| C(1)-Si(1)-C(2)   | 116.25(5)  | O(2)-Li(1)-C(5)       | 114.30(9)  |
| C(3)-Si(1)-C(2)   | 104.41(6)  | C(1)-Li(1)-C(5)       | 115.40(9)  |
| C(4)-Si(1)-C(2)   | 105.41(6)  | O(1)-Li(1)-C(13)      | 55.55(5)   |
| C(5)-Si(2)-C(6)   | 111.11(5)  | O(2)-Li(1)-C(13)      | 29.50(4)   |
| C(5)-Si(2)-C(7)   | 110.08(5)  | C(1)-Li(1)-C(13)      | 111.52(8)  |
| C(6)-Si(2)-C(7)   | 108.22(6)  | C(5)-Li(1)-C(13)      | 130.47(9)  |
| C(5)-Si(2)-C(8)   | 117.89(5)  | O(3)-Li(2)-O(4)       | 80.82(7)   |
| C(6)-Si(2)-C(8)   | 105.46(6)  | O(3)-Li(2)-C(5)       | 114.37(9)  |
| C(7)-Si(2)-C(8)   | 103.47(6)  | O(4)-Li(2)-C(5)       | 125.98(9)  |
| C(21)-Si(3)-C(22) | 111.51(5)  | O(3)-Li(2)-C(1)       | 115.19(9)  |
| C(21)-Si(3)-C(23) | 110.90(5)  | O(4)-Li(2)-C(1)       | 103.45(8)  |
| C(22)-Si(3)-C(23) | 107.94(5)  | C(5)-Li(2)-C(1)       | 113.33(9)  |
| C(21)-Si(3)-C(24) | 116.20(5)  | O(6)-Li(3)-O(5)       | 80.78(7)   |
| C(22)-Si(3)-C(24) | 105.18(5)  | O(6)-Li(3)-C(21)      | 113.13(9)  |
| C(23)-Si(3)-C(24) | 104.52(5)  | O(5)-Li(3)-C(21)      | 130.23(9)  |
| C(11)-O(1)-C(12)  | 112.60(10) | O(6)-Li(3)-C(21)#1    | 111.83(9)  |
| C(11)-O(1)-Li(1)  | 124.64(9)  | O(5)-Li(3)-C(21)#1    | 104.13(8)  |
| C(12)-O(1)-Li(1)  | 108.93(8)  | C(21)-Li(3)-C(21)#1   | 112.61(8)  |
| C(13)-O(2)-C(14)  | 111.90(9)  | O(6)-Li(3)-Li(3)#1    | 133.52(13) |
| C(13)-O(2)-Li(1)  | 105.49(8)  | O(5)-Li(3)-Li(3)#1    | 142.72(13) |
| C(14)-O(2)-Li(1)  | 121.24(9)  | C(21)-Li(3)-Li(3)#1   | 57.78(8)   |
| C(16)-O(3)-C(15)  | 112.32(9)  | C(21)#1-Li(3)-Li(3)#1 | 54.83(7)   |
| C(16)-O(3)-Li(2)  | 113.32(8)  | Si(1)-C(1)-Li(1)      | 114.29(7)  |
| C(15)-O(3)-Li(2)  | 124.20(9)  | Si(1)-C(1)-Li(2)      | 119.74(7)  |
| C(18)-O(4)-C(17)  | 111.23(9)  | Li(1)-C(1)-Li(2)      | 65.13(7)   |
| C(18)-O(4)-Li(2)  | 123.55(8)  | Si(2)-C(5)-Li(2)      | 106.29(7)  |



# The first asymmetric organolithium tetramers with simple ether donor bases

Tanja Tatic<sup>a</sup>, Kathrin Meindl<sup>a</sup>, Julian Henn<sup>a</sup>, Sushil Kumar Pandey<sup>b</sup>, and Dietmar Stalke<sup>\*a</sup>

## Supplementary Material

---

|                     |           |
|---------------------|-----------|
| Si(2)-C(5)-Li(1)    | 131.61(8) |
| Li(2)-C(5)-Li(1)    | 65.43(7)  |
| O(1)-C(12)-C(13)    | 106.55(9) |
| O(2)-C(13)-C(12)    | 107.09(9) |
| O(2)-C(13)-Li(1)    | 45.01(6)  |
| C(12)-C(13)-Li(1)   | 76.83(7)  |
| O(3)-C(16)-C(17)    | 107.87(9) |
| O(4)-C(17)-C(16)    | 107.59(9) |
| Si(3)-C(21)-Li(3)   | 109.16(7) |
| Si(3)-C(21)-Li(3)#1 | 148.04(8) |
| Li(3)-C(21)-Li(3)#1 | 67.39(8)  |
| O(5)-C(32)-C(33)    | 107.54(9) |
| O(6)-C(33)-C(32)    | 107.51(9) |

---

Symmetry transformations used to generate equivalent atoms:

#1 -x,-y+1,-z

# The first asymmetric organolithium tetramers with simple ether donor bases

Tanja Tatic<sup>a</sup>, Kathrin Meindl<sup>a</sup>, Julian Henn<sup>a</sup>, Sushil Kumar Pandey<sup>b</sup>, and Dietmar Stalke<sup>\*a</sup>

## Supplementary Material

Final Energy: 1: -2292.2441095 a.u.  
2: -2370.880678 a.u.  
3: -1530.29689 a.u.

### Final Geometry 1:

|     |           |           |           |
|-----|-----------|-----------|-----------|
| Li1 | 1.209606  | 0.287585  | 0.984151  |
| Li2 | -1.299998 | 0.760385  | 0.192880  |
| Li3 | -0.270047 | -1.496710 | -0.070253 |
| Li4 | 0.534726  | 0.226287  | -1.458171 |
| Si5 | -0.482805 | -2.238699 | 2.823078  |
| Si6 | 1.271452  | 3.117808  | -1.718630 |
| Si7 | 2.481801  | -2.231287 | -2.116214 |
| Si8 | -3.053392 | -1.625338 | -1.826470 |
| C9  | 1.439262  | 2.312818  | 3.631351  |
| H10 | 0.811101  | 2.620754  | 2.793181  |
| H11 | 1.534159  | 3.167688  | 4.306909  |
| H12 | 0.936346  | 1.507454  | 4.170336  |
| C13 | 2.817698  | 1.884270  | 3.167399  |
| H14 | 3.431797  | 1.595421  | 4.029427  |
| H15 | 3.325600  | 2.710158  | 2.657631  |
| O16 | 2.728338  | 0.757208  | 2.280012  |
| C17 | 3.958041  | 0.012274  | 2.175981  |
| H18 | 3.701353  | -0.884992 | 1.614265  |
| H19 | 4.256764  | -0.297883 | 3.184815  |
| C20 | 5.081560  | 0.767577  | 1.480721  |
| H21 | 4.774264  | 1.103352  | 0.487793  |
| H22 | 5.942761  | 0.104419  | 1.359330  |
| H23 | 5.415748  | 1.637407  | 2.051133  |
| C24 | 0.566476  | 2.098681  | -0.316640 |
| C25 | 1.060149  | 4.997197  | -1.502414 |
| H26 | 0.003520  | 5.281465  | -1.449848 |
| H27 | 1.506432  | 5.561695  | -2.328743 |
| H28 | 1.530956  | 5.345816  | -0.576951 |
| C29 | 0.443783  | 2.683130  | -3.379817 |
| H30 | 0.633203  | 1.655055  | -3.711207 |
| H31 | 0.808087  | 3.333899  | -4.181899 |

|     |           |           |           |
|-----|-----------|-----------|-----------|
| H32 | -0.643787 | 2.806411  | -3.337031 |
| C33 | 3.135100  | 2.795235  | -1.909790 |
| H34 | 3.687980  | 3.120196  | -1.021740 |
| H35 | 3.550945  | 3.339665  | -2.763893 |
| H36 | 3.363566  | 1.735213  | -2.062074 |
| C37 | -1.553509 | -0.517131 | -1.652836 |
| C38 | -2.549479 | -3.428345 | -2.147266 |
| H39 | -1.963831 | -3.521086 | -3.067747 |
| H40 | -3.433423 | -4.064063 | -2.265723 |
| H41 | -1.953321 | -3.863646 | -1.339220 |
| C42 | -4.138377 | -1.602429 | -0.263624 |
| H43 | -3.603609 | -1.970722 | 0.617488  |
| H44 | -5.025186 | -2.232517 | -0.390286 |
| H45 | -4.492279 | -0.594532 | -0.024004 |
| C46 | -4.192801 | -1.126731 | -3.268969 |
| H47 | -4.580990 | -0.109064 | -3.147355 |
| H48 | -5.057969 | -1.792815 | -3.362392 |
| H49 | -3.658439 | -1.150778 | -4.224547 |
| C50 | -0.664910 | -0.613464 | 1.918220  |
| C51 | 1.245023  | -2.430681 | 3.587192  |
| H52 | 2.035764  | -2.427384 | 2.831078  |
| H53 | 1.327651  | -3.374700 | 4.135924  |
| H54 | 1.466514  | -1.624966 | 4.294734  |
| C55 | -0.722569 | -3.705443 | 1.624847  |
| H56 | -1.712562 | -3.704122 | 1.156476  |
| H57 | -0.636531 | -4.657349 | 2.159113  |
| H58 | 0.027678  | -3.748833 | 0.824369  |
| C59 | 1.895036  | -1.274011 | -0.622634 |
| C60 | 4.343718  | -2.627332 | -2.092808 |
| H61 | 4.948079  | -1.714365 | -2.053191 |
| H62 | 4.660152  | -3.187238 | -2.980006 |
| H63 | 4.610847  | -3.228597 | -1.216961 |
| C64 | 1.569913  | -3.888209 | -2.267802 |
| H65 | 1.731761  | -4.519301 | -1.387009 |
| H66 | 1.924458  | -4.455614 | -3.134715 |
| H67 | 0.489459  | -3.765216 | -2.386567 |
| C68 | 2.171875  | -1.250939 | -3.720649 |

# The first asymmetric organolithium tetramers with simple ether donor bases

Tanja Tatic<sup>a</sup>, Kathrin Meindl<sup>a</sup>, Julian Henn<sup>a</sup>, Sushil Kumar Pandey<sup>b</sup>, and Dietmar Stalke<sup>\*a</sup>

## Supplementary Material

|     |           |           |           | Final Geometry 2: |           |           |           |
|-----|-----------|-----------|-----------|-------------------|-----------|-----------|-----------|
| H69 | 1.105463  | -1.099915 | -3.923370 | Li                | -1.379704 | -0.648656 | -0.122104 |
| H70 | 2.579001  | -1.780566 | -4.588414 | Li                | 1.299330  | -0.499195 | 0.381168  |
| H71 | 2.650854  | -0.265155 | -3.706152 | Li                | 0.211613  | 0.765912  | -1.530203 |
| C72 | -1.740493 | -2.503041 | 4.225944  | Li                | -0.268280 | 1.503464  | 0.638418  |
| H73 | -1.644398 | -1.730884 | 4.996955  | O                 | -2.993928 | -2.011971 | -0.333580 |
| H74 | -1.613764 | -3.473299 | 4.719252  | C                 | -3.949066 | -1.654904 | -1.334356 |
| H75 | -2.770403 | -2.460112 | 3.855452  | H                 | -3.673710 | -0.669220 | -1.700251 |
| C76 | -4.151285 | 1.602168  | 2.772349  | H                 | -4.962444 | -1.600462 | -0.927824 |
| H77 | -5.131359 | 1.765271  | 2.317840  | H                 | -3.930517 | -2.356119 | -2.172044 |
| H78 | -4.210184 | 1.944162  | 3.810015  | C                 | -3.291142 | -3.233066 | 0.430004  |
| H79 | -3.950618 | 0.529429  | 2.780030  | C                 | -3.694464 | -4.378899 | -0.505340 |
| C80 | -3.044198 | 2.354897  | 2.048734  | H                 | -2.946568 | -4.526578 | -1.288512 |
| H81 | -3.221339 | 3.435284  | 2.065015  | H                 | -4.665025 | -4.215392 | -0.977698 |
| H82 | -2.084433 | 2.174378  | 2.535229  | H                 | -3.767372 | -5.306693 | 0.066773  |
| O83 | -2.865365 | 1.921455  | 0.686434  | C                 | -4.393194 | -2.931066 | 1.451022  |
| C84 | -3.806935 | 2.465684  | -0.257802 | H                 | -5.337772 | -2.664539 | 0.971396  |
| H85 | -4.811165 | 2.439431  | 0.176605  | H                 | -4.097179 | -2.107160 | 2.103420  |
| H86 | -3.802961 | 1.773748  | -1.100837 | H                 | -4.584146 | -3.808232 | 2.074919  |
| C87 | -3.444972 | 3.870514  | -0.718670 | C                 | -1.985637 | -3.583100 | 1.139229  |
| H88 | -3.447451 | 4.590122  | 0.103517  | H                 | -1.195426 | -3.781548 | 0.411515  |
| H89 | -4.174391 | 4.214201  | -1.458099 | H                 | -2.117404 | -4.478277 | 1.751676  |
| H90 | -2.457488 | 3.888647  | -1.183858 | H                 | -1.665238 | -2.773402 | 1.796193  |
| H91 | -0.365976 | 2.625202  | -0.040626 | O                 | 2.738383  | -1.907710 | 1.025553  |
| H92 | 1.240269  | 2.344500  | 0.525403  | C                 | 2.090459  | -3.086423 | 1.503461  |
| H93 | -1.758710 | -0.460037 | 1.861163  | H                 | 1.051699  | -3.028543 | 1.185528  |
| H94 | -0.342222 | 0.149227  | 2.648364  | H                 | 2.121473  | -3.146646 | 2.594584  |
| H95 | 2.038548  | -1.967324 | 0.226618  | H                 | 2.526986  | -3.991817 | 1.075625  |
| H96 | 2.679872  | -0.509177 | -0.466485 | C                 | 4.207015  | -1.904051 | 1.103677  |
| H97 | -1.955932 | 0.501774  | -1.826794 | C                 | 4.781009  | -2.934161 | 0.122863  |
| H98 | -1.000321 | -0.702021 | -2.595907 | H                 | 4.545747  | -3.962469 | 0.405777  |
|     |           |           |           | H                 | 5.870374  | -2.852489 | 0.092172  |
|     |           |           |           | H                 | 4.400137  | -2.757852 | -0.885323 |
|     |           |           |           | C                 | 4.665285  | -2.184895 | 2.538949  |
|     |           |           |           | H                 | 4.437744  | -3.204541 | 2.858080  |
|     |           |           |           | H                 | 4.197010  | -1.489248 | 3.238665  |
|     |           |           |           | H                 | 5.748095  | -2.059157 | 2.612863  |

# The first asymmetric organolithium tetramers with simple ether donor bases

Tanja Tatic<sup>a</sup>, Kathrin Meindl<sup>a</sup>, Julian Henn<sup>a</sup>, Sushil Kumar Pandey<sup>b</sup>, and Dietmar Stalke<sup>\*a</sup>

## Supplementary Material

---

|    |           |           |           |    |           |           |           |
|----|-----------|-----------|-----------|----|-----------|-----------|-----------|
| C  | 4.620734  | -0.497692 | 0.683528  | Si | 2.091876  | 3.351791  | -1.080404 |
| H  | 4.183966  | 0.255523  | 1.341160  | C  | 3.936067  | 3.820492  | -1.134899 |
| H  | 4.306856  | -0.284276 | -0.339285 | H  | 4.099869  | 4.800507  | -1.597035 |
| H  | 5.707453  | -0.396005 | 0.727735  | H  | 4.519506  | 3.090564  | -1.706588 |
| C  | -1.818702 | 1.459905  | -0.980629 | H  | 4.367056  | 3.858821  | -0.128705 |
| Si | -3.330693 | 2.360552  | -0.338028 | C  | 1.205772  | 4.743974  | -0.142272 |
| C  | -4.694789 | 2.579842  | -1.649752 | H  | 1.403030  | 5.717900  | -0.602590 |
| H  | -5.559515 | 3.126172  | -1.256446 | H  | 1.545976  | 4.809949  | 0.897017  |
| H  | -5.064155 | 1.617333  | -2.021366 | H  | 0.119516  | 4.615019  | -0.123191 |
| H  | -4.324698 | 3.135798  | -2.517470 | C  | 1.488577  | 3.393301  | -2.887419 |
| C  | -2.884105 | 4.107090  | 0.258043  | H  | 1.737127  | 4.349358  | -3.360139 |
| H  | -2.144420 | 4.115603  | 1.064186  | H  | 0.402778  | 3.275342  | -2.977333 |
| H  | -3.770961 | 4.626421  | 0.636578  | H  | 1.958513  | 2.613058  | -3.497096 |
| H  | -2.481056 | 4.715607  | -0.558069 | C  | 0.321727  | -1.419667 | -1.542117 |
| C  | -4.147929 | 1.454430  | 1.122857  | H  | -0.614038 | -2.007819 | -1.503628 |
| H  | -3.473921 | 1.361013  | 1.980225  | H  | 1.049571  | -2.084944 | -1.042514 |
| H  | -4.467909 | 0.442184  | 0.855253  | Si | 0.826789  | -1.506585 | -3.341016 |
| H  | -5.038523 | 1.989816  | 1.469174  | C  | 0.565116  | -3.211088 | -4.145833 |
| C  | -0.388987 | -0.251623 | 1.956713  | H  | -0.489549 | -3.506451 | -4.120242 |
| H  | -1.481153 | -0.427051 | 2.002048  | H  | 1.129138  | -3.989152 | -3.620377 |
| H  | 0.032334  | -1.245867 | 2.180714  | H  | 0.882488  | -3.228450 | -5.194476 |
| Si | -0.023655 | 0.739739  | 3.500205  | C  | 2.665368  | -1.070650 | -3.550573 |
| C  | -1.038214 | 0.220449  | 5.022599  | H  | 2.964060  | -1.087913 | -4.603846 |
| H  | -0.851178 | -0.826133 | 5.286162  | H  | 3.307725  | -1.784253 | -3.023349 |
| H  | -2.113607 | 0.317580  | 4.839154  | H  | 2.906063  | -0.074320 | -3.164894 |
| H  | -0.803043 | 0.826483  | 5.904693  | C  | -0.169680 | -0.267841 | -4.394226 |
| C  | 1.808319  | 0.607917  | 3.982365  | H  | -1.248837 | -0.429248 | -4.298766 |
| H  | 2.091876  | -0.428221 | 4.194210  | H  | 0.075843  | -0.370517 | -5.456619 |
| H  | 2.023019  | 1.192133  | 4.883089  | H  | 0.019554  | 0.782266  | -4.139895 |
| H  | 2.471455  | 0.975166  | 3.193059  | H  | -2.214192 | 0.719742  | -1.701526 |
| C  | -0.392836 | 2.592592  | 3.233811  | H  | -1.361512 | 2.209231  | -1.657519 |
| H  | -1.444414 | 2.778723  | 2.991860  |    |           |           |           |
| H  | 0.218673  | 3.060412  | 2.451336  |    |           |           |           |
| H  | -0.182631 | 3.158810  | 4.147262  |    |           |           |           |
| C  | 1.755130  | 1.688423  | -0.298186 |    |           |           |           |
| H  | 2.504256  | 1.022324  | -0.766116 |    |           |           |           |
| H  | 2.129211  | 1.792342  | 0.737323  |    |           |           |           |

# The first asymmetric organolithium tetramers with simple ether donor bases

Tanja Tatic<sup>a</sup>, Kathrin Meindl<sup>a</sup>, Julian Henn<sup>a</sup>, Sushil Kumar Pandey<sup>b</sup>, and Dietmar Stalke<sup>\*a</sup>

## Supplementary Material

### Final Geometry 3:

|    |           |           |           |
|----|-----------|-----------|-----------|
| Si | -3.050408 | -1.384928 | 0.185864  |
| Si | 3.050385  | 1.384915  | -0.185828 |
| O  | -1.782340 | 2.229573  | -1.281259 |
| O  | -0.964281 | 2.635038  | 1.258088  |
| O  | 0.964243  | -2.635011 | -1.258093 |
| O  | 1.782362  | -2.229583 | 1.281233  |
| Li | -0.649345 | 0.994720  | 0.020486  |
| Li | 0.649308  | -0.994723 | -0.020451 |
| C  | -1.400099 | -0.890301 | 0.864476  |
| H  | -1.571882 | -0.427259 | 1.853952  |
| H  | -0.892565 | -1.840902 | 1.116445  |
| C  | -3.940038 | -2.788208 | 1.130832  |
| H  | -3.338172 | -3.704359 | 1.141742  |
| H  | -4.910868 | -3.043615 | 0.689574  |
| H  | -4.118320 | -2.512024 | 2.176020  |
| C  | -2.902864 | -2.010590 | -1.610222 |
| H  | -2.547522 | -1.221354 | -2.282241 |
| H  | -3.860271 | -2.368788 | -2.004085 |
| H  | -2.190180 | -2.839803 | -1.680777 |
| C  | -4.271674 | 0.077938  | 0.165575  |
| H  | -4.448218 | 0.462886  | 1.176915  |
| H  | -5.246229 | -0.215145 | -0.239877 |
| H  | -3.894380 | 0.904846  | -0.442718 |
| C  | 1.400065  | 0.890314  | -0.864431 |
| H  | 1.571818  | 0.427293  | -1.853921 |
| H  | 0.892530  | 1.840924  | -1.116360 |
| C  | 4.271673  | -0.077935 | -0.165654 |
| H  | 3.894432  | -0.904875 | 0.442629  |
| H  | 5.246245  | 0.215152  | 0.239756  |
| H  | 4.448168  | -0.462841 | -1.177019 |
| C  | 2.902857  | 2.010471  | 1.610296  |
| H  | 2.190173  | 2.839680  | 1.680900  |
| H  | 3.860262  | 2.368643  | 2.004185  |
| H  | 2.547507  | 1.221195  | 2.282263  |
| C  | 3.939983  | 2.788257  | -1.130733 |
| H  | 4.118260  | 2.512126  | -2.175936 |

|   |           |           |           |
|---|-----------|-----------|-----------|
| H | 4.910814  | 3.043657  | -0.689471 |
| H | 3.338104  | 3.704400  | -1.141595 |
| C | -1.649004 | 2.169867  | -2.696206 |
| H | -2.474662 | 2.702032  | -3.182466 |
| H | -1.684434 | 1.118407  | -2.974399 |
| H | -0.693995 | 2.598048  | -3.019123 |
| C | -1.776126 | 3.555379  | -0.769552 |
| H | -2.584540 | 4.145302  | -1.222246 |
| H | -0.818834 | 4.041493  | -1.000632 |
| C | -1.981518 | 3.473965  | 0.726274  |
| H | -1.916434 | 4.479739  | 1.163049  |
| H | -2.969726 | 3.055551  | 0.956184  |
| C | -1.010885 | 2.517273  | 2.674639  |
| H | -0.880321 | 3.498102  | 3.146214  |
| H | -0.190360 | 1.865490  | 2.965996  |
| H | -1.960217 | 2.078497  | 3.001282  |
| C | 1.010763  | -2.517202 | -2.674643 |
| H | 1.960051  | -2.078360 | -3.001324 |
| H | 0.190184  | -1.865459 | -2.965937 |
| H | 0.880231  | -3.498024 | -3.146239 |
| C | 1.981565  | -3.473884 | -0.726362 |
| H | 2.969733  | -3.055396 | -0.956309 |
| H | 1.916528  | -4.479649 | -1.163167 |
| C | 1.776255  | -3.555369 | 0.769472  |
| H | 0.819022  | -4.041586 | 1.000581  |
| H | 2.584749  | -4.145230 | 1.222105  |
| C | 1.649114  | -2.169960 | 2.696191  |
| H | 0.694172  | -2.598258 | 3.019151  |
| H | 1.684452  | -1.118510 | 2.974434  |
| H | 2.474860  | -2.702063 | 3.182371  |

# The first asymmetric organolithium tetramers with simple ether donor bases

Tanja Tatic<sup>a</sup>, Kathrin Meindl<sup>a</sup>, Julian Henn<sup>a</sup>, Sushil Kumar Pandey<sup>b</sup>, and Dietmar Stalke<sup>\*a</sup>

## Supplementary Material

---

### References:

- 1 D. Stalke, *Chem. Soc. Rev.*, 1998, **27**, 171; T. Kottke and D. Stalke, *J. Appl. Crystallogr.*, 1993, **26**, 615.
- 2 T. Schulz, K. Meindl, D. Leusser, D. Stern, J. Graf, C. Michaelson, M. Ruf, G. M. Sheldrick and D. Stalke, *J. Appl. Crystallogr.*, 2009, **42**, 885.
- 3 G. M. Sheldrick, *Acta Crystallogr., Sect. A.*, 2008, **64**, 112; G. M. Sheldrick, *Methods Enzymol.*, 1997, **277**, 319; G. M. Sheldrick, *Acta Crystallogr., Sect. A.*, 1990, **46**, 467.
